# Supplementary material for: The Spectrum of Major Seed Storage Genes and Proteins in Oats (Avena sativa)
Source: PubMed Central journal article supplement (PMC4108316; doi:10.1371/journal.pone.0083569), 2014-07-23

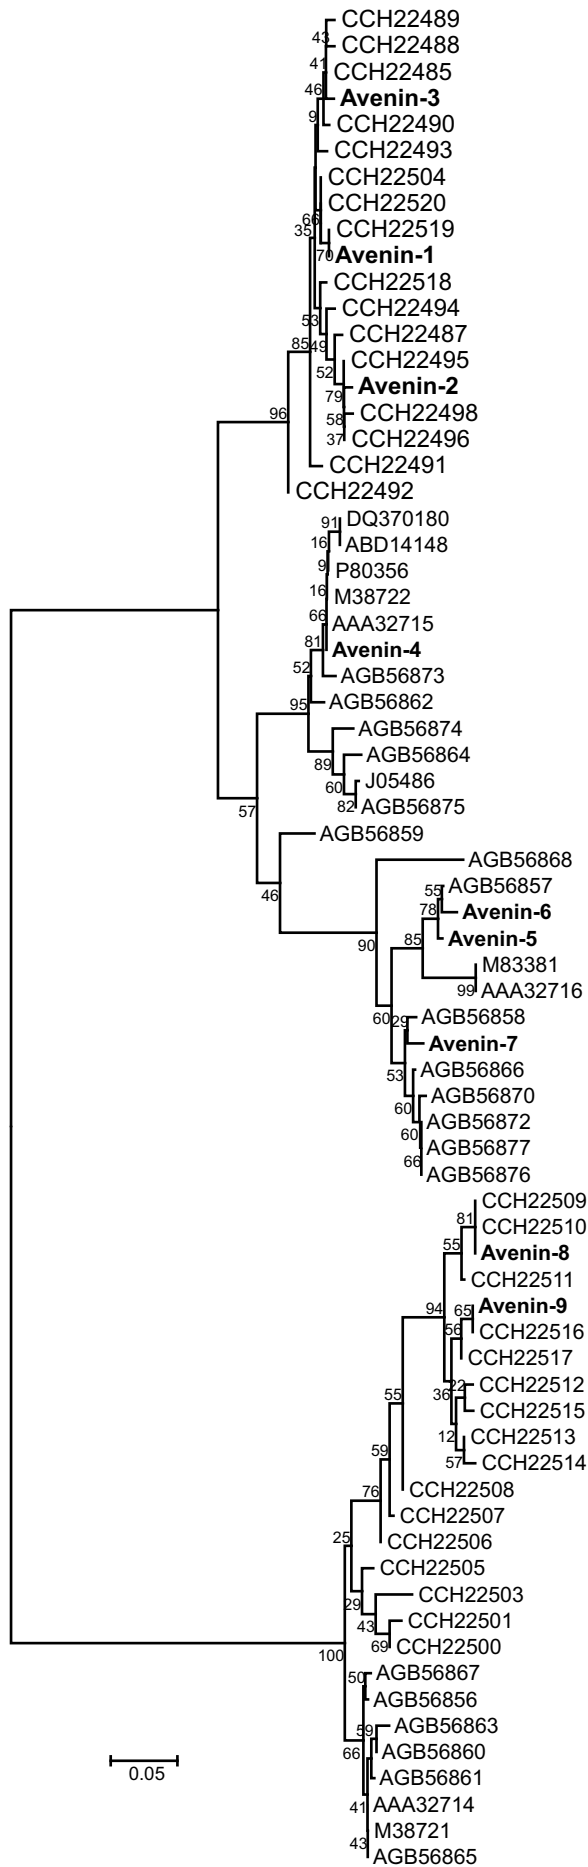

Supplement: pone.0083569.s001.pdf [file pone.0083569.s001.pdf]
